# Supplementary material for: Srs2 and Mus81–Mms4 Prevent Accumulation of Toxic Inter-Homolog Recombination Intermediates
Source: PubMed Central journal article supplement (PMC4936719; doi:10.1371/journal.pgen.1006136), 2016-07-07

**S1 Fig. Characterization of the *GAL-SRS2* and *GAL-srs2<sup>K41A</sup>* strains.**

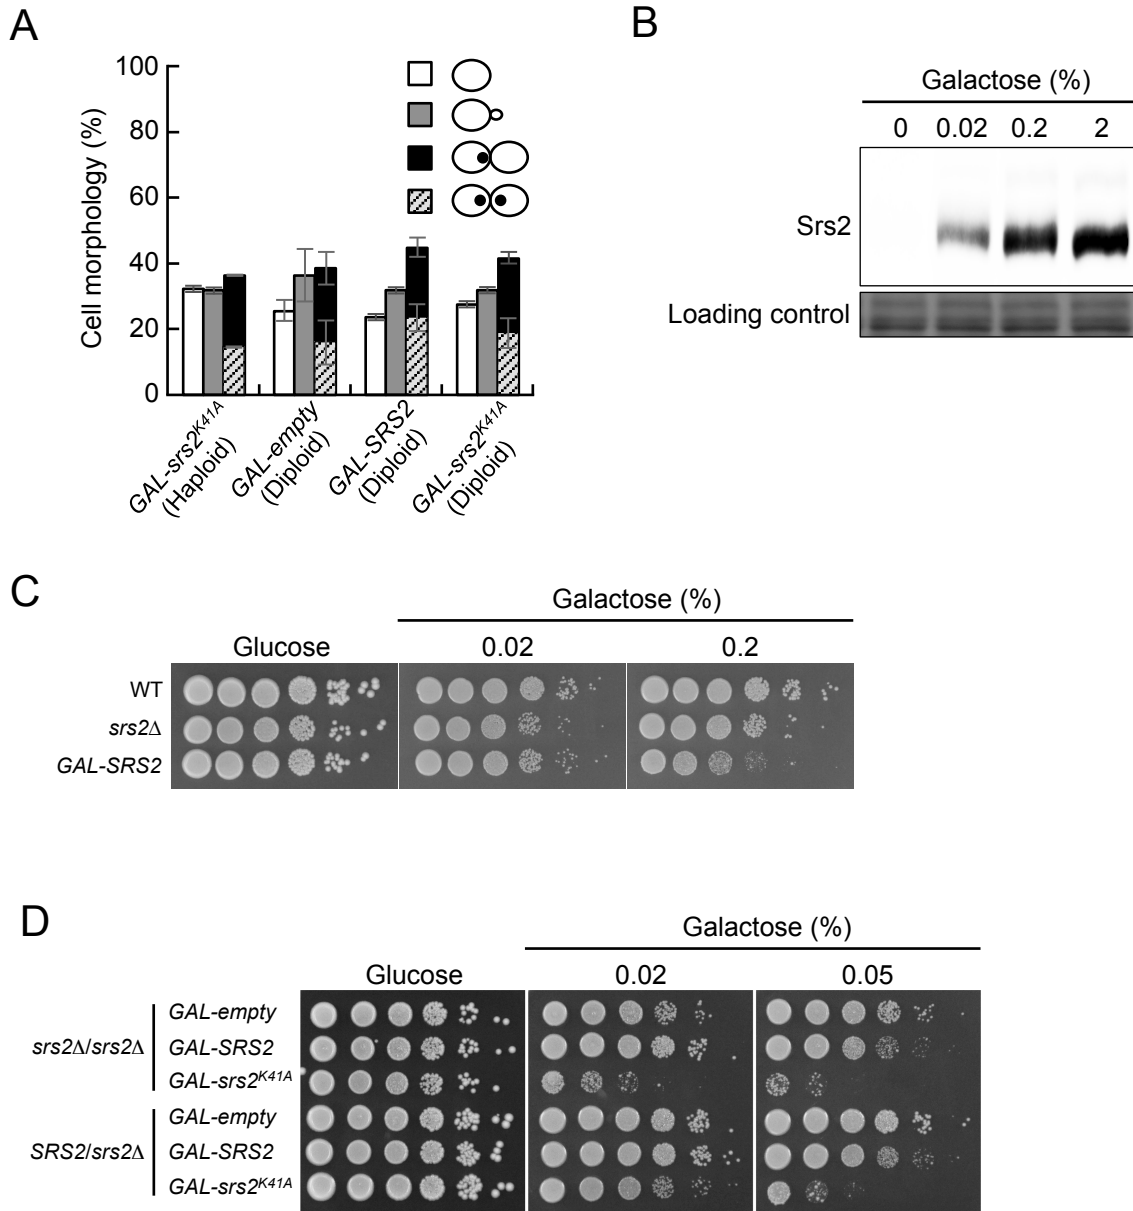

Supplement: pgen.1006136.s001.pdf [file pgen.1006136.s001.pdf]
