# Supplementary material for: Srs2 and Mus81–Mms4 Prevent Accumulation of Toxic Inter-Homolog Recombination Intermediates
Source: PubMed Central journal article supplement (PMC4936719; doi:10.1371/journal.pgen.1006136), 2016-07-07

**S6 Fig. Analysis of *srs2*Δ *mms4*Δ and *srs2*Δ *mus81*Δ diploid cells**

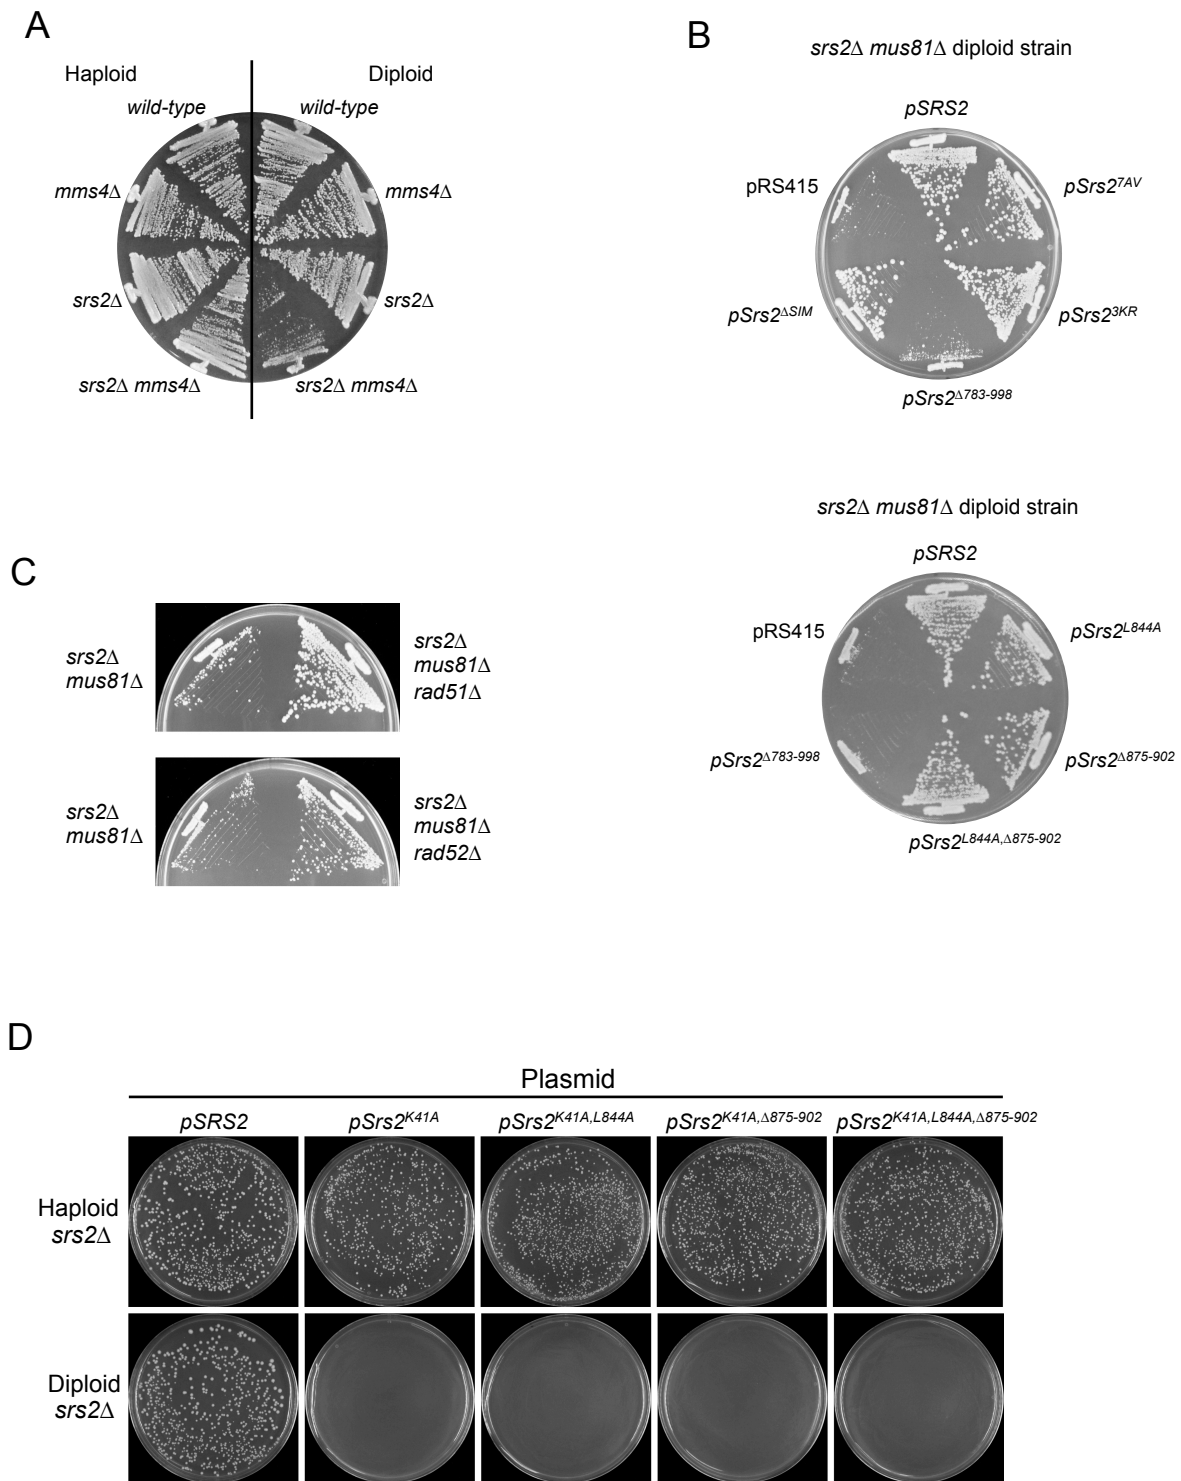

Supplement: pgen.1006136.s006.pdf [file pgen.1006136.s006.pdf]
