# Supplementary material for: Srs2 and Mus81–Mms4 Prevent Accumulation of Toxic Inter-Homolog Recombination Intermediates
Source: PLOS journal article supplement (doi:10.1371/journal.pgen.1006136), 2016-07-07

**S2 Fig. Analysis of GFP-fused alpha-tubulin foci in *GAL-srs2<sup>K41A</sup>* diploid cells.**

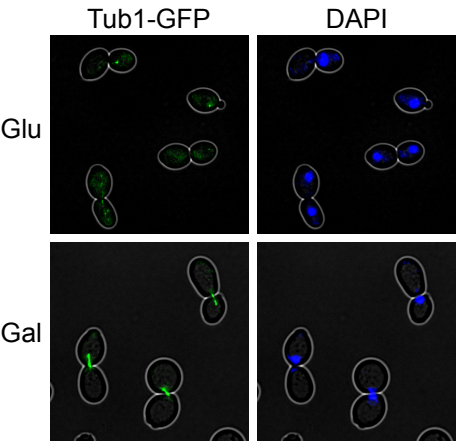

Supplement: S2 (10.1371/journal.pgen.1006136.s002) [file journal.pgen.1006136.s002]
